# Supplementary material for: Untargeted NMR Spectroscopic Analysis of the Metabolic Variety of New Apple Cultivars
Source: MDPI journal article supplement (doi:10.3390/metabo6030029), 2016-09-19
Supplement: s1 [file s1]

# Supplementary Materials: Untargeted NMR Spectroscopic Analysis of the Metabolic Variety of New Apple Cultivars

Philipp Eisenmann, Mona Ehlers, Christoph Weinert, Pavleta Tzvetkova, Mara Silber, Manuela J. Rist, Burkhard Luy and Claudia Muhle-Goll

Table S1. NMR signals used for analysis.

| ppm                                            | Compound                   |
|------------------------------------------------|----------------------------|
| 0.91, 1.01                                     | Isoleucine                 |
| 0.98, 1.04                                     | Valine                     |
| 1.32                                           | Lactate                    |
| 1.47                                           | Alanine                    |
| 1.88, 1.98                                     | Quinic acid                |
| 2.05                                           | Acetate                    |
| 2.64, 2.82, 4.39                               | Malic acid                 |
| 2.68, 2.88, 2.89                               | Citrate                    |
| 3.19                                           | Choline                    |
| 3.21, 3.31, 3.51, 3.92, 4.56, 4.58, 4.64, 4.19 | Xylose                     |
| 3.22, 3.24, 3.40, 3.45, 3.52, 3.73, 5.22       | Glucose                    |
| 3.25, 3.27, 3.62                               | myo-Inositol               |
| 3.20, 3.67, 3.75, 3.77, 4.05, 4.21, 5.40       | Sucrose                    |
| 3.60, 3.65, 3.70, 4.00, 4.10                   | Fructose                   |
| 4.33, 4.98, 6.09                               | Epicatechin                |
| 4.55                                           | Tartrate                   |
| 4.57, 4.59, 5.26                               | Galactose                  |
| 5.49                                           | Arabinose                  |
| 1.26                                           | Rhamnitol                  |
| 1.45, 2.71, 2.74                               | Citramalic acid            |
| 2.37                                           | Pyruvate                   |
| 3.34                                           | Betaine                    |
| 6.38, 7.19, 7.65                               | Chlorogenic acid           |
| 6.11, 6.25, 6.83, 7.14                         | Phloricine                 |
| Overlap:                                       |                            |
| 3.48, 3.88                                     | Glucose, Sucros            |
| 3.56, 3.81                                     | Glucose, Fructose, Sucrose |
| 4.03                                           | Sucrose, Fructose          |

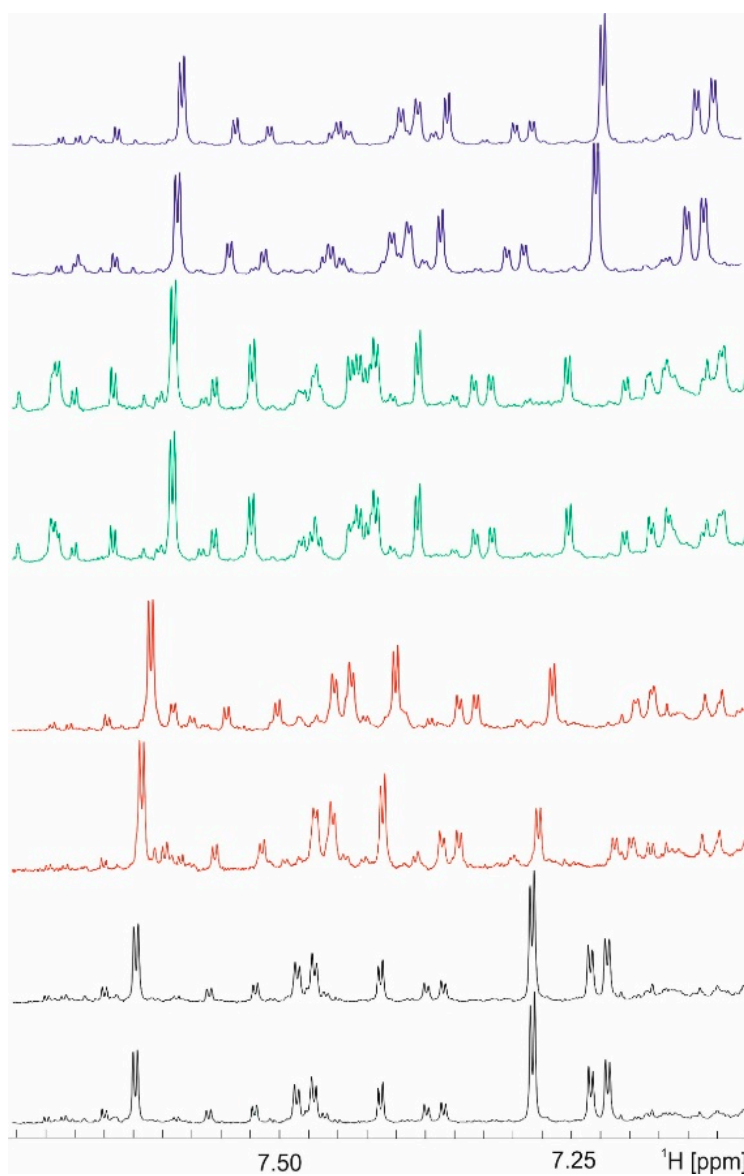

**Figure S1.** pH-Shifts observed for peel extracts exemplified for four different cultivars. For the sake of clarity only two spectra, respectively, are shown. Black: Red Topaz, red: Galiwa, green: Isaaq, blue: Ladina.

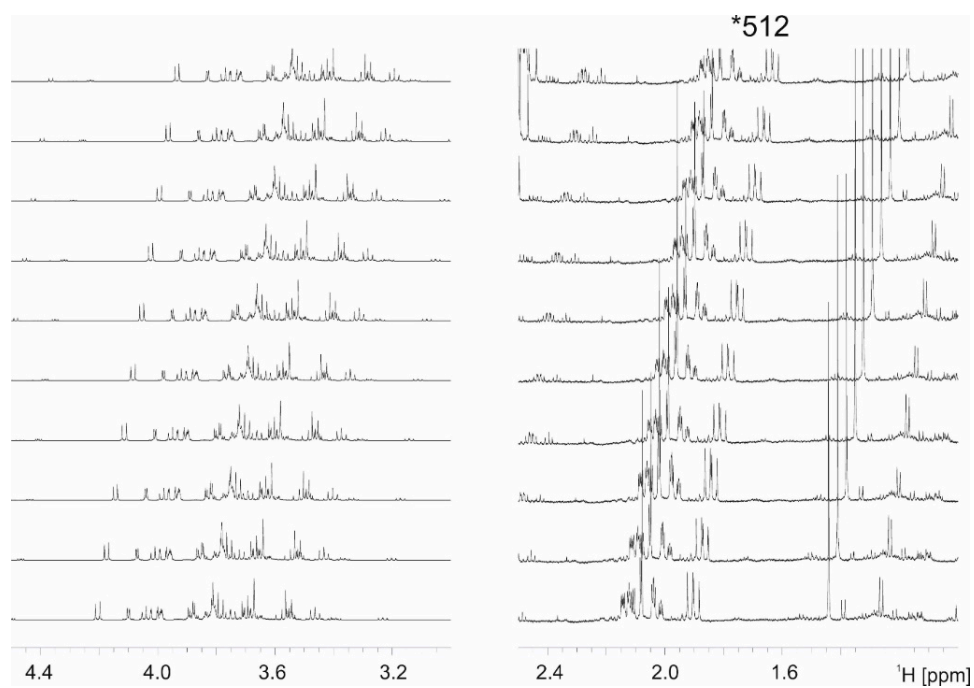

**Figure S2.** Sample variability within pulp extracts (here: Galiwa). The sugar (**left**) and aliphatic (**right**, multiplied by a factor of 512) regions of the spectra are shown.

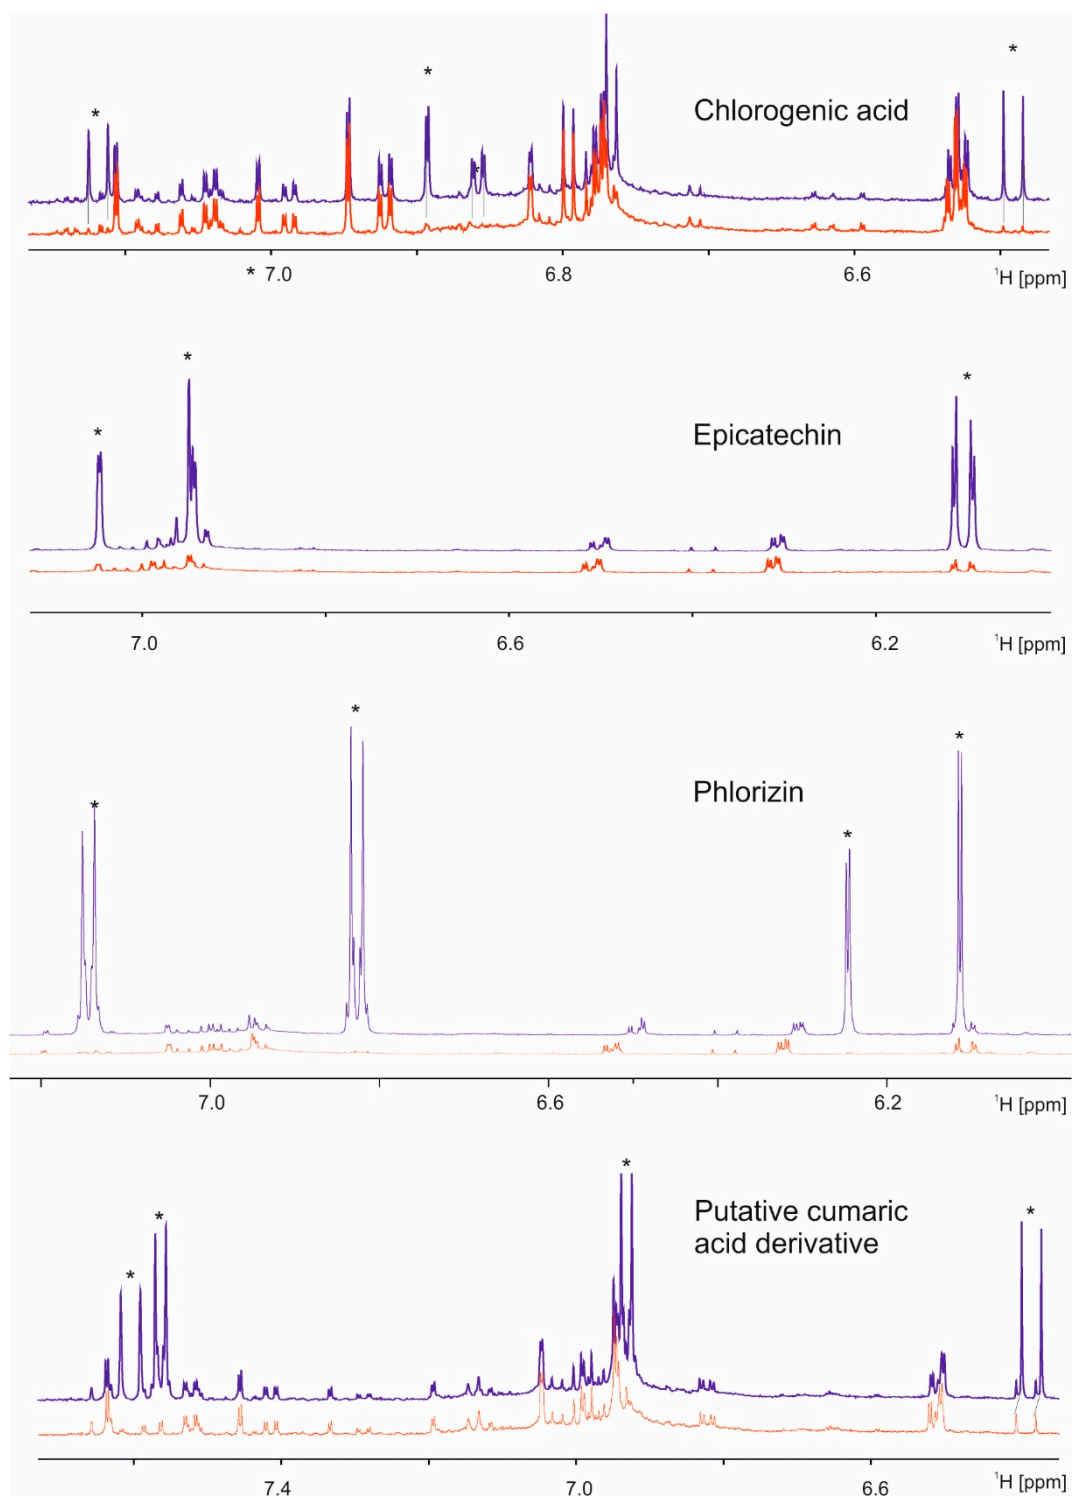

**Figure S3.** Spiking with pure substances to identify polyphenolic compounds. \* denotes the resonances of the spiked substances.

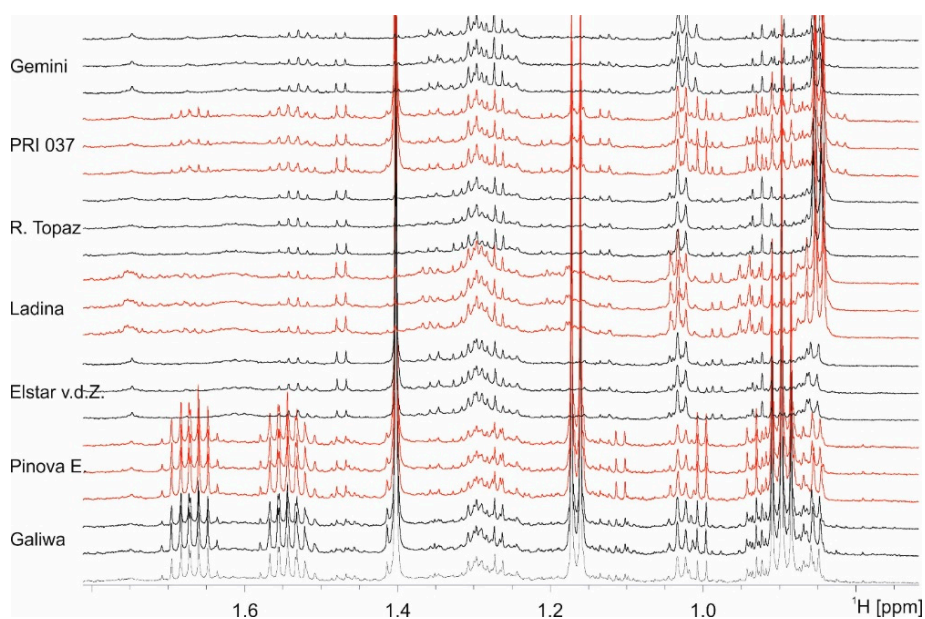

Figure S4. Sample variability between the cultivars.

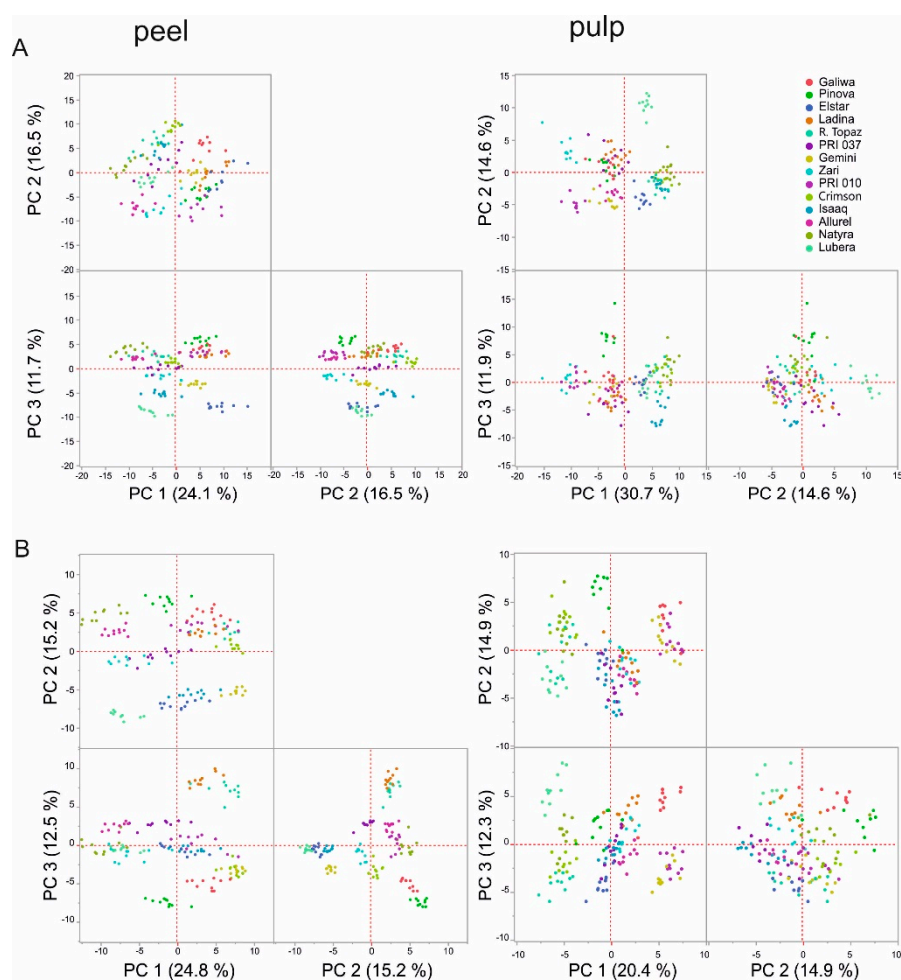

Figure S5. PCA two-dimensional views. (A) All buckets were used for the analysis. (B) Main sugar resonances were omitted from the analysis.

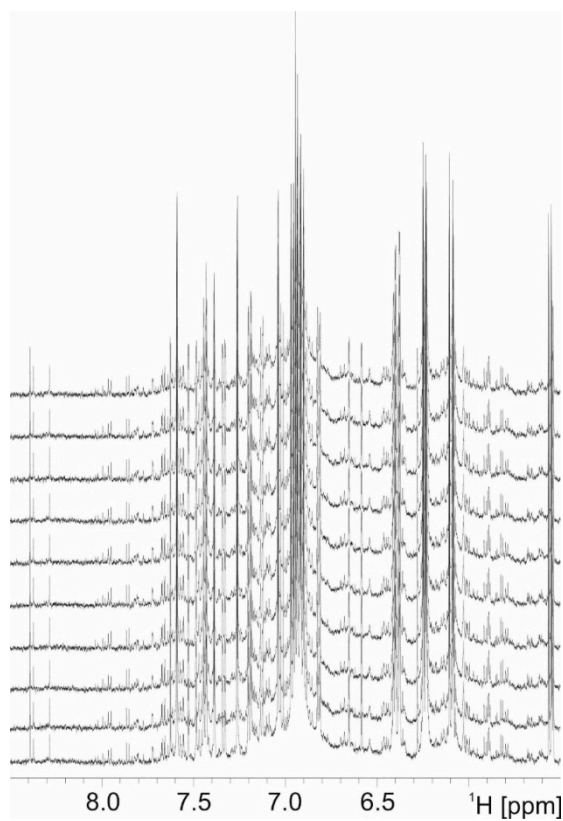

**Figure S6.** Reproducibility of the method. The aromatic region of ten different quality control samples is shown.
